# Supplementary material for: Organizational Learning in Healthcare Contexts after COVID-19: A Study of 10 Intensive Care Units in Central and Northern Italy through Framework Analysis
Source: MDPI journal article supplement (doi:10.3390/ijerph20176699), 2023-09-01
Supplement: s1 [file s1]

## Demographic and occupational data of the participant

### Interviews

|                |                                            |                         |
|----------------|--------------------------------------------|-------------------------|
| Interviewee 1  | San Valentino Civil Hospital, Montebelluna | Head of ICU             |
| Interviewee 2  | Merate Hospital                            | ICU nursing manager     |
| Interviewee 3  | Maggiore Hospital, Bologna                 | ICU manager             |
| Interviewee 4  | San Giovanni Bosco Hospital, Turin         | ICU nursing manager     |
| Interviewee 5  | Lecco Hospital                             | ICU nursing manager     |
| Interviewee 6  | Azienda Ospedaliera S. Anna, Como          | ICU nursing manager     |
| Interviewee 7  | San Donato Hospital, Arezzo                | ICU manager             |
| Interviewee 8  | Maurizio Bufalini Hospital, Cesena         | ICU nurse manager       |
| Interviewee 9  | Maggiore della Carità Hospital, Novara     | ICU physician in charge |
| Interviewee 10 | Misericordia Hospital, Grosseto            | ICU manager             |

### Focus groups

|                                                    |                |                              |
|----------------------------------------------------|----------------|------------------------------|
| Focus group n.1<br>Maggiore Hospital, Bologna      | Participant 1  | Psychologist-psychotherapist |
|                                                    | Participant 2  | Infectivologist              |
|                                                    | Participant 3  | Physician                    |
|                                                    | Participant 4  | Physiotherapist              |
|                                                    | Participant 5  | Physician                    |
|                                                    | Participant 6  | Healthcare assistant         |
|                                                    | Participant 7  | Healthcare assistant         |
|                                                    | Participant 8  | Physician                    |
|                                                    | Participant 9  | Physician                    |
|                                                    | Participant 10 | Nurse                        |
|                                                    | Participant 11 | Nurse                        |
| Focus group n.2<br>Misericordia Hospital, Grosseto | Participant 1  | Physician                    |
|                                                    | Participant 2  | Physician                    |
|                                                    | Participant 3  | Physician                    |
|                                                    | Participant 4  | Physician                    |
|                                                    | Participant 5  | ICU nursing manager          |
|                                                    | Participant 6  | ICU nursing manager          |
|                                                    | Participant 7  | Nurse                        |
|                                                    | Participant 8  | Trainee physician            |
|                                                    | Participant 9  | Nurse                        |
|                                                    | Participant 10 | Healthcare assistant         |
|                                                    | Participant 11 | Infectivologist              |
|                                                    | Participant 12 | ICU manager                  |
| Focus group n.3                                    | Participant 1  | Physician                    |

|                                                          |                |                              |
|----------------------------------------------------------|----------------|------------------------------|
| Maggiore della Carità<br>Hospital, Novara                | Participant 2  | Physician                    |
|                                                          | Participant 3  | Physician                    |
|                                                          | Participant 4  | Trainee physician            |
|                                                          | Participant 5  | ICU nursing manager          |
|                                                          | Participant 6  | ICU nursing manager          |
|                                                          | Participant 7  | Nurse                        |
|                                                          | Participant 8  | Nurse                        |
|                                                          | Participant 9  | Nurse                        |
|                                                          | Participant 10 | Nurse                        |
|                                                          | Participant 11 | Infectivologist              |
| Focus group n.4<br>Lecco Hospital                        | Participant 1  | Nurse                        |
|                                                          | Participant 2  | Nurse                        |
|                                                          | Participant 3  | Healthcare assistant         |
|                                                          | Participant 4  | Healthcare assistant         |
|                                                          | Participant 5  | Infectivologist              |
|                                                          | Participant 6  | Healthcare assistant         |
|                                                          | Participant 7  | ICU nursing manager          |
|                                                          | Participant 8  | ICU manager                  |
|                                                          | Participant 9  | Nurse                        |
|                                                          | Participant 10 | Psychologist-psychotherapist |
|                                                          | Participant 11 | Physician                    |
|                                                          | Participant 12 | Physician                    |
|                                                          | Participant 13 | Physician                    |
| Focus group n.5<br>Maurizio Bufalini Hospital,<br>Cesena | Participant 1  | Physician                    |
|                                                          | Participant 2  | Physician                    |
|                                                          | Participant 3  | Nurse                        |
|                                                          | Participant 4  | Healthcare assistant         |
|                                                          | Participant 5  | Physiotherapist              |
|                                                          | Participant 6  | ICU nursing manager          |
|                                                          | Participant 7  | ICU manager                  |
|                                                          | Participant 8  | Physician                    |
|                                                          | Participant 9  | Physician                    |
|                                                          | Participant 10 | Physician                    |
|                                                          | Participant 11 | Nurse                        |
| Focus group n.6<br>San Donato Hospital, Arezzo           | Participant 1  | Head of ICU                  |
|                                                          | Participant 2  | Psychologist-psychotherapist |
|                                                          | Participant 3  | Physician                    |
|                                                          | Participant 4  | Physician                    |
|                                                          | Participant 5  | Physician                    |
|                                                          | Participant 6  | Nurse                        |
|                                                          | Participant 7  | ICU nursing manager          |
|                                                          | Participant 8  | Nurse                        |
|                                                          | Participant 9  | Nurse                        |
|                                                          | Participant 10 | Healthcare assistant         |
|                                                          | Participant 11 | Healthcare assistant         |
|                                                          | Participant 12 | Infectivologist              |
| Focus group n.7                                          | Participant 1  | ICU nursing manager          |

|                                                          |                |                      |
|----------------------------------------------------------|----------------|----------------------|
| San Valentino Civil Hospital,<br>Montebelluna            | Participant 2  | Nurse                |
|                                                          | Participant 3  | Healthcare assistant |
|                                                          | Participant 4  | Nurse                |
|                                                          | Participant 5  | Physiotherapist      |
|                                                          | Participant 6  | Physician            |
|                                                          | Participant 7  | Physician            |
|                                                          | Participant 8  | Physician            |
| Focus group n.8<br>San Giovanni Bosco Hospital,<br>Turin | Participant 1  | Physician            |
|                                                          | Participant 2  | Physician            |
|                                                          | Participant 3  | Physiotherapist      |
|                                                          | Participant 4  | Nurse                |
|                                                          | Participant 5  | Nurse                |
|                                                          | Participant 6  | ICU nursing manager  |
|                                                          | Participant 7  | Physician            |
|                                                          | Participant 8  | Healthcare assistant |
|                                                          | Participant 9  | Infectivologist      |
|                                                          | Participant 10 | Healthcare assistant |
| Focus group n.9<br>Azienda Ospedaliera S. Anna,<br>Como  | Participant 1  | ICU nursing manager  |
|                                                          | Participant 2  | Healthcare assistant |
|                                                          | Participant 3  | Infectivologist      |
|                                                          | Participant 4  | Healthcare assistant |
|                                                          | Participant 5  | Physician            |
|                                                          | Participant 6  | Physician            |
|                                                          | Participant 7  | Nurse                |
| Focus group n.10<br>Merate Hospital (Lecco)              | Participant 8  | Nurse                |
|                                                          | Participant 1  | Nurse                |
|                                                          | Participant 2  | Nurse                |
|                                                          | Participant 3  | Infectivologist      |
|                                                          | Participant 4  | ICU nursing manager  |
|                                                          | Participant 5  | Physician            |
|                                                          | Participant 6  | Physician            |
|                                                          | Participant 7  | Physician            |
